# Supplementary material for: Conjugates of methylated cyclodextrin derivatives and hydroxyethyl starch (HES): Synthesis, cytotoxicity and inclusion of anaesthetic actives
Source: publisher site journal article supplement (doi:10.3762/bjoc.10.325), 2014-12-19
Supplement: Additional file 2 [file 1860-5397-10-325-S2.pdf]

# Supporting Information File 2

for

## **Conjugates of methylated cyclodextrin derivatives and hydroxyethyl starch (HES): Synthesis, cytotoxicity and inclusion of anaesthetic actives**

Lisa Markenstein<sup>1</sup>, Antje Appelt-Menzel<sup>2</sup>, Marco Metzger<sup>2</sup> and Gerhard Wenz<sup>1\*</sup>

Address: <sup>1</sup>Organic Macromolecular Chemistry, Saarland University, Campus C4.2,  
66123 Saarbrücken, Germany and <sup>2</sup>Department of Tissue Engineering and  
Regenerative Medicine, University Hospital Würzburg, Röntgenring 11, 97070  
Würzburg, Germany

Email: Gerhard Wenz - g.wenz@mx.uni-saarland.de

\*Corresponding author

**NMR spectra of HES, 1a, 1b, 6, and IR spectra of HES, 2, 5a**

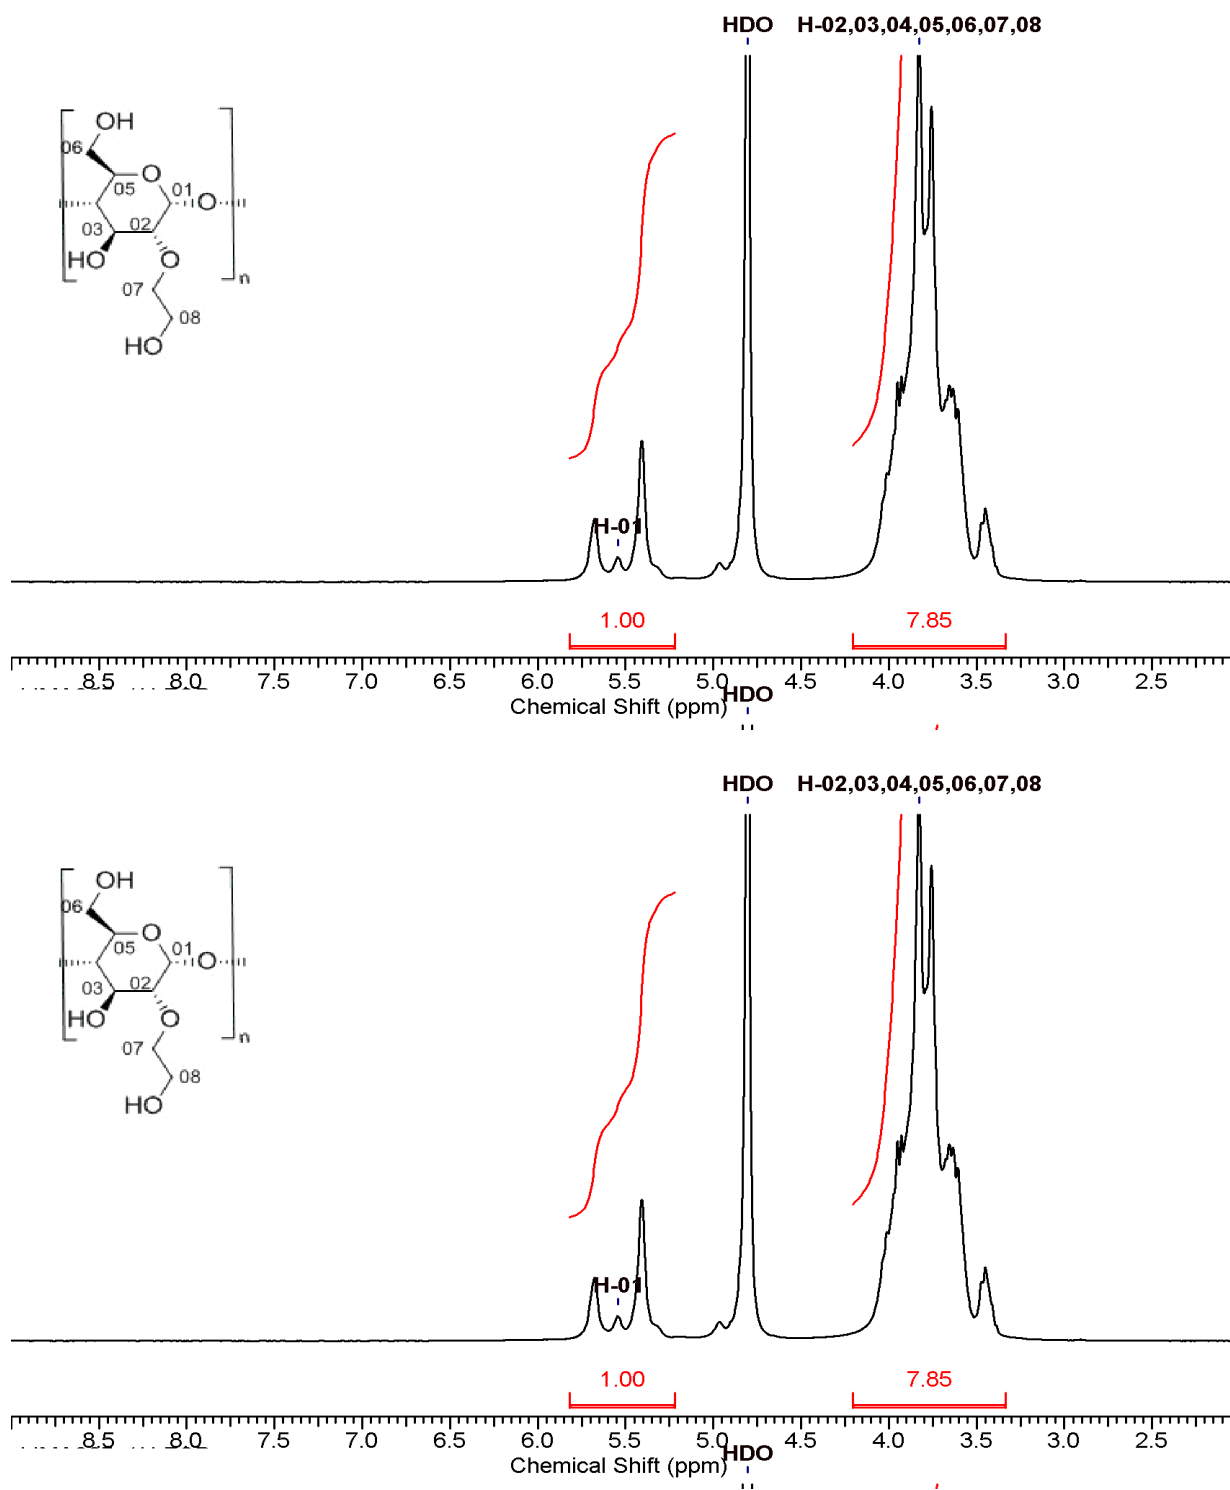

**Figure 1s.**  $^1\text{H}$  NMR of HES in  $\text{D}_2\text{O}$

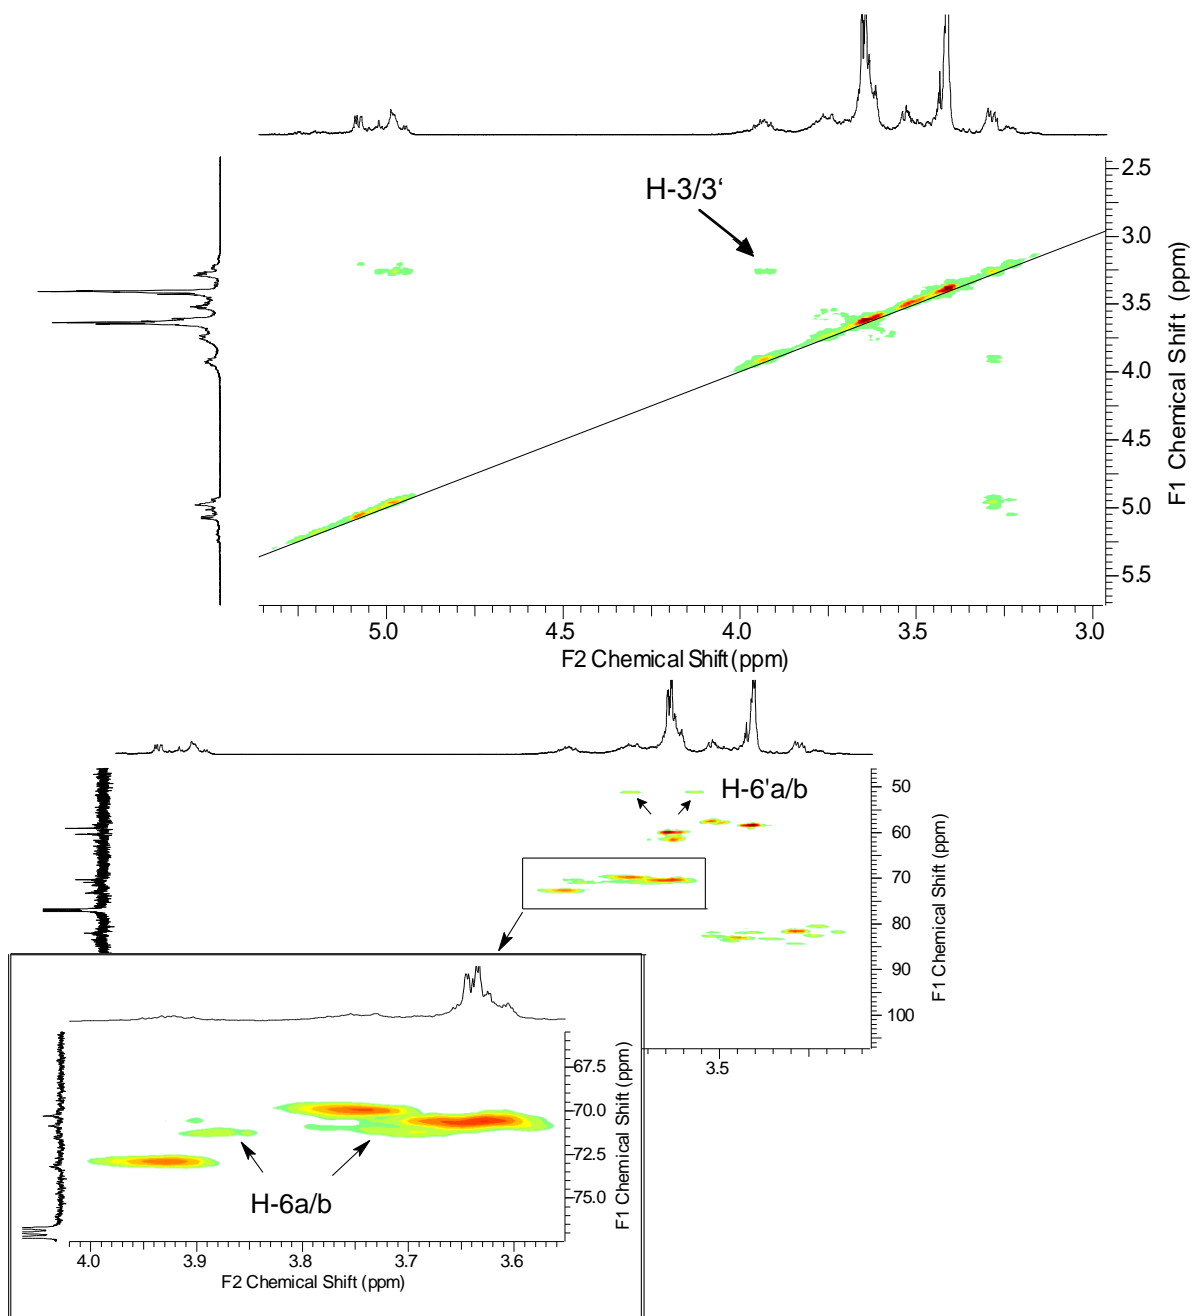

**Figure 2s.**  $^1\text{H}$ -COSY and HSQC spectra of azido functionalized DIMEB **1a** in  $\text{D}_2\text{O}$ . The HH-COSY indicates the distinct correlation between H-1/1' at 5.0 ppm, H-2/2' at 3.25 ppm and H-3/3' at 3.92 ppm.

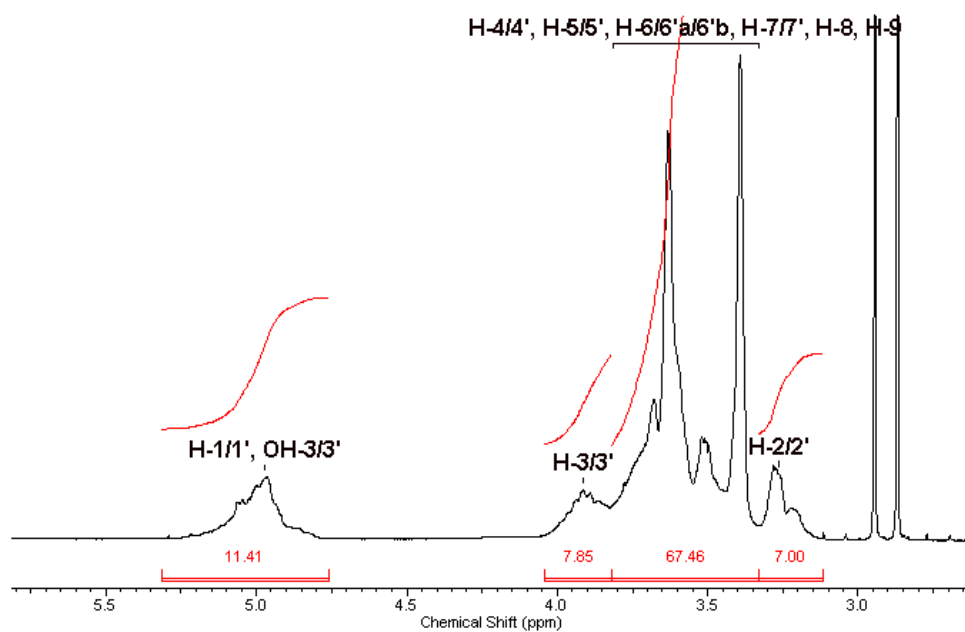

**Figure 3s.**  $^1\text{H}$  NMR spectrum of azido functionalized RAMEB **1b** in  $\text{D}_2\text{O}$ , large signals were truncated for a better resolution of the small signals.

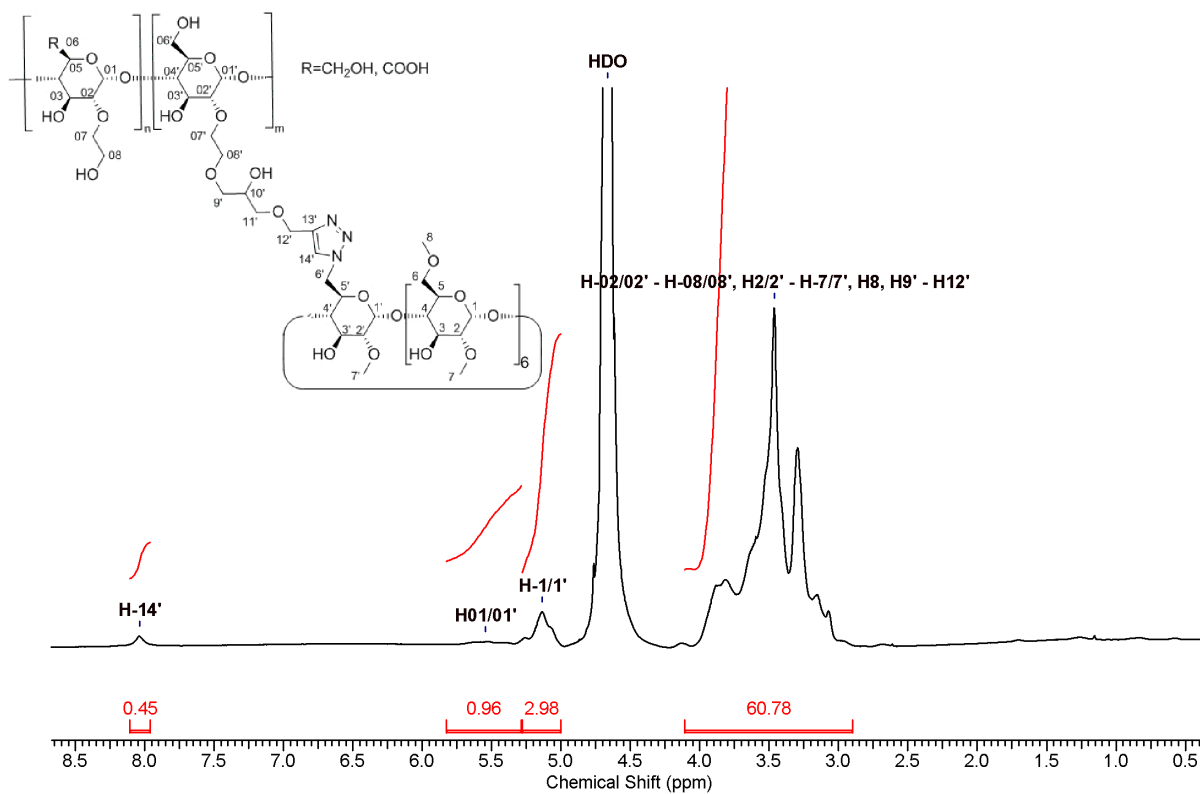

**Figure 4s.**  $^1\text{H-NMR}$  spectrum of conjugate of DIMEB and oxidized HES 6.

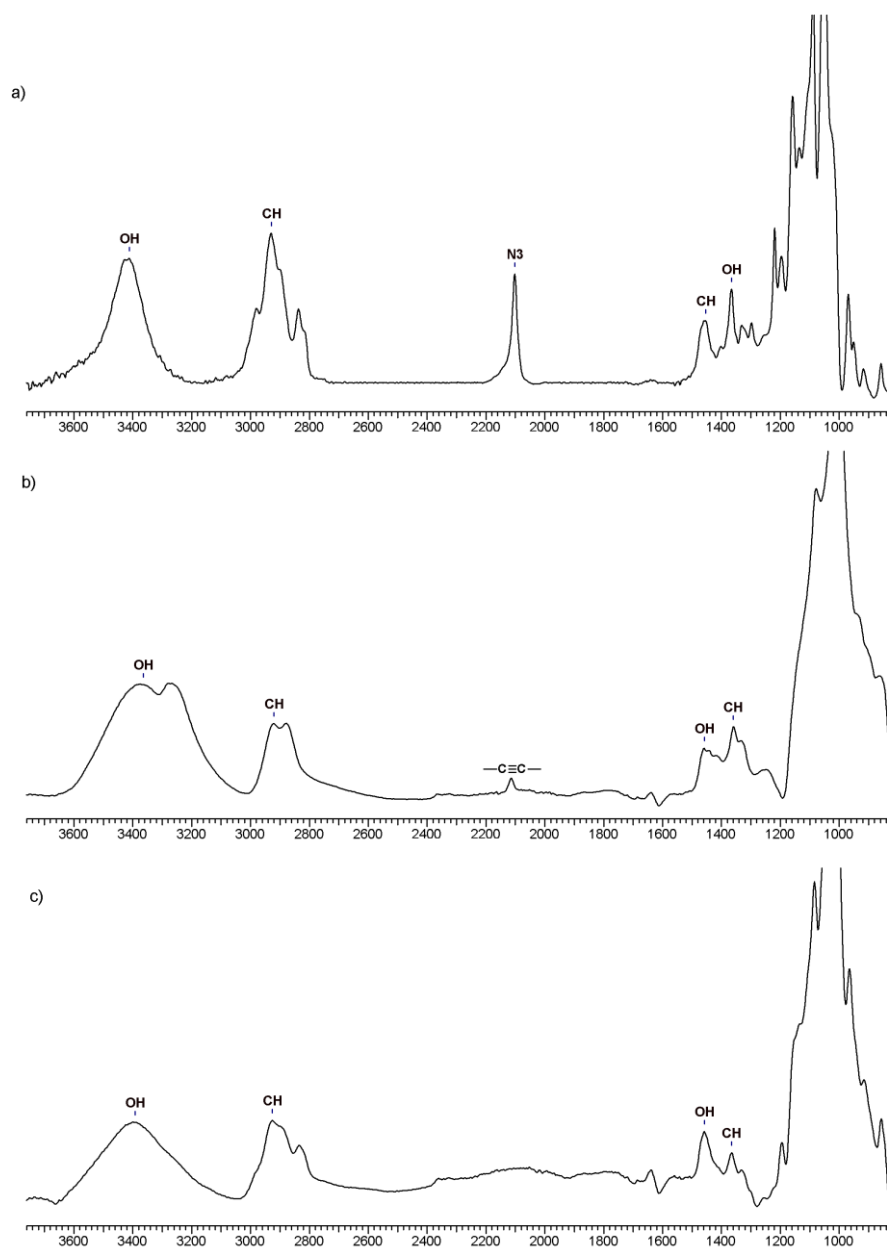

**Figure 5s.** FT-IR spectra of a) **1a**, b) propargylated HES **2** and c) conjugate of HES and DIMEB **5a**
